# Supplementary material
Source: PubMed Central journal article supplement (PMC10122965)

A

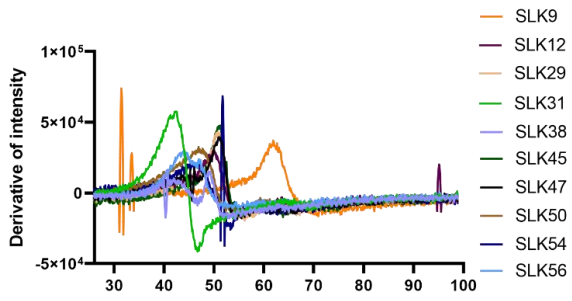

B

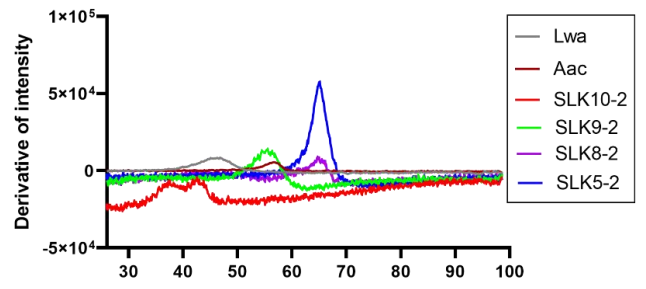

Supplement: mmc1.pdf [file mmc1.pdf]

A

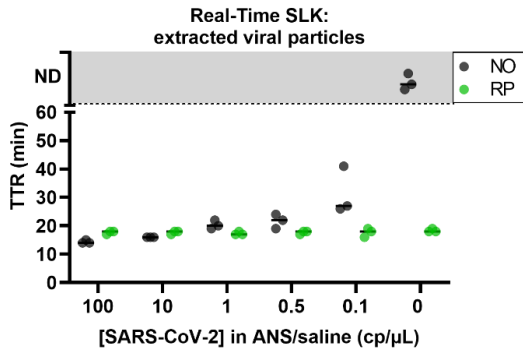

B

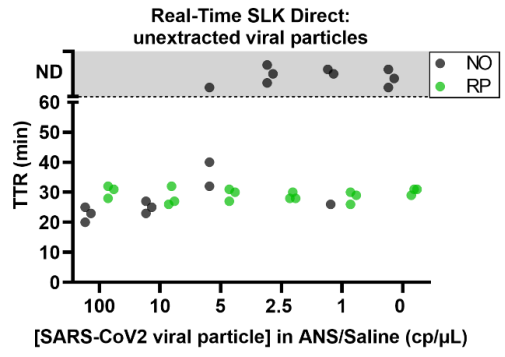

Supplement: mmc2.pdf [file mmc2.pdf]

A

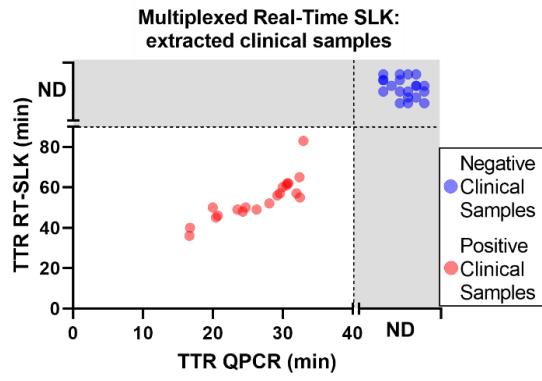

B

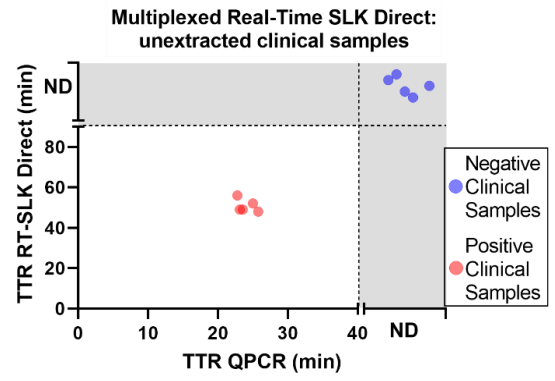

Supplement: mmc3.pdf [file mmc3.pdf]
